# Supplementary material for: The Impact of Interventions to Prevent Neonatal Healthcare-associated Infections in Low- and Middle-income Countries: A Systematic Review
Source: PubMed Central journal article supplement — Pediatr Infect Dis J. 2022 Feb 8;41(3):S26–35. doi: 10.1097/INF.0000000000003320 (PMC8815829; doi:10.1097/inf.0000000000003320), 2022-02-08
Supplement: inf-41-s26-s001.pdf [file inf-41-s26-s001.pdf]

Supplementary Appendix

Filters applied to initial search results with number of records identified

|                 |                    |                                      |                   |                  |
|-----------------|--------------------|--------------------------------------|-------------------|------------------|
| Aids 7          | Community 163      | Intermittent preventive treatment 20 | Pharmacokinetic 8 | tubercu 6        |
| Anthrax 4       | Cystic fibrosis 10 | Iron deficiency 3                    | Plasmodium 30     | Tuberculosis 135 |
| ART 29          | Dengue 20          | Leishmaniasis 37                     | Pneumococc 59     | Typhoid 11       |
| Arthritis 6     | Diarrh 41          | Leukemia 5                           | Polio 6           | Viral 31         |
| Bone 4          | Diphtheria 8       | Malaria 490                          | Refug 6           | Virus 280        |
| Bronchiolitis 2 | Ebola 3            | Mass drug 3                          | Rubella 23        | Worm 4           |
| Buruli 2        | Enteric 9          | Measles 75                           | Sexua 7           | Zoo 3            |
| Cancer 19       | Filari 3           | Meningococcal 20                     | Shisto -8         |                  |
| Case report 40  | Helminth 9         | Morrhagic 6                          | Sickle 18         |                  |
| Cellulitis 3    | Hepatitis 173      | Nevirapine 6                         | Sleeping 5        |                  |
| Chlamydia 23    | HIV 541            | Onycho 7                             | Surge 24          |                  |

|                 |               |               |                 |  |
|-----------------|---------------|---------------|-----------------|--|
| Cholera 15      | Household 6   | Orthopaedic 2 | Surgi- 47       |  |
| Circumcision 15 | Hypospadias 6 | Parasite 15   | Toxoplasmosis 9 |  |
| Clostridium 23  | Influenza 65  | Pertussis- 18 | Trachoma 5      |  |

Supplementary Table 1: ICROMS Quality Criteria applied for each study, by study design (from Zingg *et al.*, 2016)<sup>1</sup>

| Quality Criteria                |                                                                                               | Study design |     |      |       |      |    |      |  |
|---------------------------------|-----------------------------------------------------------------------------------------------|--------------|-----|------|-------|------|----|------|--|
| Dimension                       | Specific criteria                                                                             | RCT          | CBA | CITS | NCITS | NCBA | CS | QUAL |  |
| 1. Clear aims and justification | a. Clear statement of aims                                                                    | ++           | ++  | ++   | ++    | ++   | ++ | ++   |  |
|                                 | b. Rationale for number of pre- and post-intervention points or adequate baseline measurement |              |     | +    | ++    | ++   |    |      |  |
|                                 | c. Explanation for lack of control group                                                      |              |     |      | +     | +    |    |      |  |
|                                 | d. Appropriateness of qualitative methodology                                                 |              |     |      |       |      |    | +    |  |
|                                 | e. Appropriate Study design                                                                   |              |     |      |       |      |    | ++   |  |

|                                                       |                                                                                                              |    |    |    |    |    |    |    |
|-------------------------------------------------------|--------------------------------------------------------------------------------------------------------------|----|----|----|----|----|----|----|
| 2. Managing bias in sampling or between groups        | a. Sequence generation                                                                                       | ++ |    |    |    |    |    |    |
|                                                       | b. Allocation concealment                                                                                    | ++ |    |    |    |    |    |    |
|                                                       | c. Justification for sample choice                                                                           |    |    |    | ++ | ++ |    |    |
|                                                       | d. Intervention and control group selection designed to protect against systematic difference/selection bias |    | ++ |    |    |    |    |    |
|                                                       | e. Comparability of groups                                                                                   |    |    |    |    |    | ++ |    |
|                                                       | f. Sampling and recruitment                                                                                  |    |    |    |    |    |    | ++ |
| 3. Managing bias in outcome measurements and blinding | a. Blinding                                                                                                  | ++ |    |    |    |    |    |    |
|                                                       | b. Baseline measurement – protection against selection bias                                                  |    | ++ |    |    |    |    |    |
|                                                       | c. Protection against contamination                                                                          |    | ++ |    |    |    |    |    |
|                                                       | d. Protection against secular changes                                                                        |    |    | ++ |    |    |    |    |
|                                                       | e. Protection against detection bias: blinded assessment of primary outcome measures                         | +  | +  | +  | +  | +  | +  |    |

|                                         |                                                                                       |   |   |    |    |    |    |   |
|-----------------------------------------|---------------------------------------------------------------------------------------|---|---|----|----|----|----|---|
|                                         | f. Reliable primary outcome measures                                                  | + | + | +  | +  | +  | +  | + |
|                                         | g. Comparability of outcomes                                                          |   |   |    |    |    | ++ |   |
| 4. Managing bias in follow up           | a. Follow up of subjects (protection against exclusion bias)                          | + |   |    |    |    |    |   |
|                                         | b. Follow up of patients or episodes of care                                          | + |   |    |    |    |    |   |
|                                         | c. Incomplete outcome data addressed                                                  | + | + | +  | +  | +  | ++ | + |
| 5. Managing bias in other study aspects | a. Protection against detection bias: intervention unlikely to affect data collection | + | + | +  | +  | +  |    |   |
|                                         | b. Protection against information bias                                                |   |   |    |    |    | +  |   |
|                                         | c. Data collection appropriate to address research aims                               |   |   |    |    |    |    | + |
|                                         | d. Attempts to mitigate effects of no control                                         |   |   |    | ++ | ++ |    |   |
| 6. Analytical Rigour                    | a. Sufficient data points to enable reliable statistical inference                    |   |   | ++ |    |    |    |   |
|                                         | b. Shaping of intervention effect specified                                           |   |   | +  |    |    |    |   |

|                                                      |                                                  |   |   |   |   |   |   |   |
|------------------------------------------------------|--------------------------------------------------|---|---|---|---|---|---|---|
|                                                      | c. Analysis sufficiently rigorous/free from bias | + | + | + | + | + | + | + |
| 7. Managing bias in reporting/ethical considerations | a. Free of selective outcome reporting           | + | + | + | + | + | + | + |
|                                                      | b. Limitations addressed                         | + | + | + | + | + | + | + |
|                                                      | c. Conclusions clear and justified               | + | + | + | + | + | + | + |
|                                                      | d. Free of other bias                            | + | + | + | + | + | + | + |
|                                                      | e. Ethics issues addressed                       | + | + | + | + | + | + | + |

<sup>a</sup>Applicability of quality criteria to each study design: + = Criteria to be included in quality assessment for study design; ++ = Mandatory criteria to be met in quality assessment; blank: criteria not to be applied in quality assessment for study design.

<sup>b</sup> Study designs: RCT: randomised controlled trial; CBA: controlled before-after; CITS: controlled interrupted time series; CS: cohort study; NCITS: non-controlled interrupted time series; NCBA: non-controlled before-after; QUAL: qualitative

Supplementary Table 2: ICROMS Decision matrix: mandatory criteria and minimum score for study type to be included in review (from Zingg *et al.*, 2016)<sup>1</sup>

| Study design | Mandatory criteria <sup>a</sup> | Minimum score |
|--------------|---------------------------------|---------------|
| RCT, cRCT    | 1A, 2A, 2B and 3A               | 22            |
| CBA          | 1A, 2D, 3B and 3C               | 18            |

|             |                   |    |
|-------------|-------------------|----|
| CITS        | 1A, 3D and 6A     | 18 |
| NCITS       | 1A, 1B, 2C and 5D | 22 |
| NCBA        | 1A, 1B, 2C and 5D | 22 |
| Cohort      | 1A, 2E, 3G and 4C | 18 |
| Qualitative | 1A, 1E and 2F     | 16 |

---

RCT, randomized controlled trial; CBA, controlled before–after; CITS, controlled interrupted time series; cRCT, cluster-randomized controlled trial; NCITS, non-controlled interrupted time series; NCBA, non-controlled before–after.

<sup>a</sup>Scores applicable to each criteria: yes (criterion met) = 2 points; unclear (unclear whether or not the criterion is met), 1 point; no (criterion not met), 0 points.

1. Zingg W, Castro-Sanchez E, Secci FV *et al.* Innovative tools for quality assessment: integrated quality criteria for review of multiple study designs (ICROMS). *Public Health* 2016; **133**: 19-37.
